# Supplementary material for: Facile Construction of Intramolecular g-CN-PTCDA Donor-Acceptor System for Efficient CO2 Photoreduction
Source: MDPI journal article supplement (doi:10.3390/catal13030600), 2023-03-16
Supplement: s1 [file s1]

# Facile Construction of Intramolecular g-CN-PTCDA Donor-Acceptor System for Efficient CO<sub>2</sub> Photoreduction

Jiajia Wei <sup>1,†</sup>, Xing Chen <sup>2,†</sup>, Xitong Ren <sup>2</sup>, Shufang Tian <sup>1,\*</sup> and Feng Bai <sup>2,\*</sup>

<sup>1</sup> Henan International Joint Laboratory of Medicinal Plants Utilization, College of Chemistry and Chemical Engineering, Henan University, Kaifeng 475004, China

<sup>2</sup> Key Laboratory for Special Functional Materials of Ministry of Education, National and Local Joint Engineering Research Center for High-Efficiency Display and Lighting Technology, Collaborative Innovation Center of Nano Functional Materials and Applications, School of Materials Science and Engineering, Henan University, Kaifeng 475004, China

\* Correspondence: tianshufang@henu.edu.cn (S.T.); baifengsun@126.com (F.B.)

† These authors contributed equally to this work.

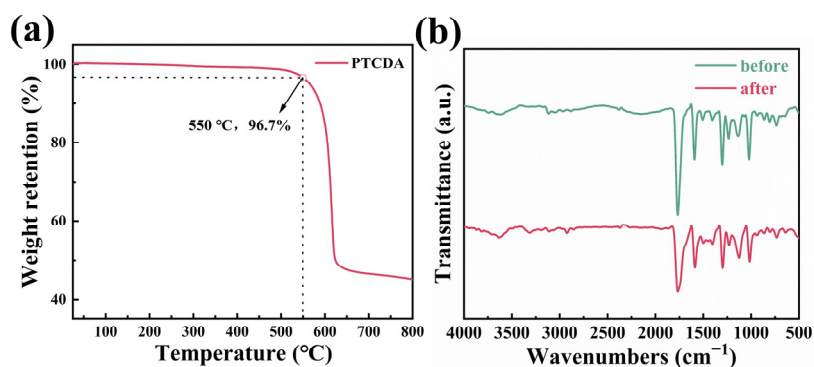

**Figure S1** TG (a), and the FT-IR spectra (b) of PTCDA before and after calcination under copolymerization conditions.

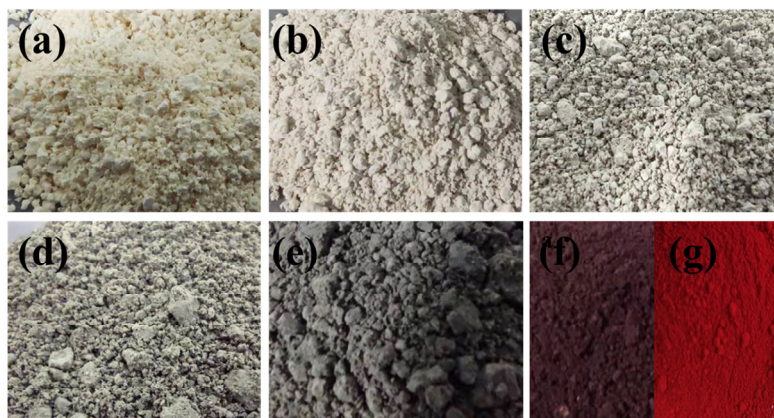

**Figure S2** The photographic images of g-CN (a), g-CN-0.5 mg PTCDA (b), g-CN-1 mg PTCDA (c), g-CN-10 mg PTCDA (d), g-CN-100 mg PTCDA (e), g-CN-1 g PTCDA (f), and PTCDA (g).

**Table S1** Surface elemental composition of g-CN, g-CN-1 mg PTCDA and g-CN-10 mg PTCDA based on XPS analysis.

| Samples          | C (Atom %) | N (Atom%) | O (Atom%) | C/N  |
|------------------|------------|-----------|-----------|------|
| g-CN             | 41.31      | 58.27     | 0.42      | 0.71 |
| g-CN-1 mg PTCDA  | 42.91      | 55.92     | 1.16      | 0.78 |
| g-CN-10 mg PTCDA | 46.45      | 50.27     | 3.28      | 0.92 |

**Table S2** The comparison with other DA structure photocatalysts towards CO<sub>2</sub> reduction under visible light.

| Catalyst               | Donor | Acceptor | Light sources              | Solvent                                           | CO evolution rate                         | Ref.      |
|------------------------|-------|----------|----------------------------|---------------------------------------------------|-------------------------------------------|-----------|
| g-CN-0.01Dbc           | Dbc   | g-CN     | --                         | H <sub>2</sub> O                                  | 2.40 $\mu\text{mol g}^{-1} \text{h}^{-1}$ | [1]       |
| PY-CN-5                | PY    | CN       | 300 W Xe lamp              | H <sub>2</sub> O                                  | 10.3 $\mu\text{mol g}^{-1} \text{h}^{-1}$ | [2]       |
| CNU-DP <sub>15.0</sub> | DP    | PCN      | 300W Xe lamp<br>(>420 nm)  | TEOA/H <sub>2</sub> O/MeCN<br>(1: 1: 5 v: v: v)   | 45.4 $\mu\text{mol g}^{-1} \text{h}^{-1}$ | [3]       |
| CN-Dbbt-0.01           | Dbbt  | CN       | 300 W Xe lamp              | H <sub>2</sub> O                                  | 0.9 $\mu\text{mol g}^{-1} \text{h}^{-1}$  | [4]       |
| DA-CTF                 | DA    | CTFs     | 300 W Xe lamp<br>(>420 nm) | TEOA/ MeCN<br>(1: 2 v: v)                         | 4.7 $\mu\text{mol g}^{-1} \text{h}^{-1}$  | [5]       |
| PD-COF-23-Ni           | MTAPP | DPP-CHO  | 300 W Xe                   | TEOA/H <sub>2</sub> O/MeCN<br>(0.5: 2: 3 v: v: v) | 40 $\mu\text{mol g}^{-1} \text{h}^{-1}$   | [6]       |
| g-CN-Bz (0.01)         | Bz    | g-CN     | 300 W Xe lamp              | H <sub>2</sub> O                                  | 0.91 $\mu\text{mol g}^{-1} \text{h}^{-1}$ | [7]       |
| g-CN-1 mg PTCDA        | PTCDA | g-CN     | 5 W LED lamp<br>(>420 nm)  | TEOA/MeCN<br>(1: 4 v: v)                          | 5.25 $\mu\text{mol g}^{-1} \text{h}^{-1}$ | This work |
| g-CN-1 mg PTCDA-Co     | PTCDA | g-CN     | 5 W LED lamp<br>(>420 nm)  | TEOA/MeCN<br>(1: 4 v: v)                          | 87.2 $\mu\text{mol g}^{-1} \text{h}^{-1}$ |           |

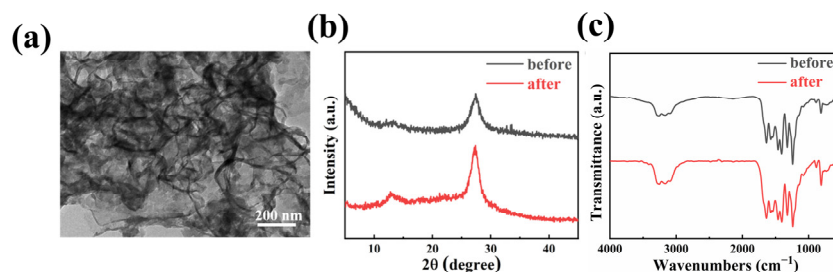

**Figure S3** TEM (a), XRD pattern (b), and FT-IR spectra (c) of g-CN-1 mg PTCDA-Co sample before and after four cycles of catalytic reaction.

**Table S3** The fitting parameters and average decay time of the time-resolved PL, rate constants of charge separation ( $k_{ET}$ ) and quantum yield ( $\eta_{ET}$ ) for g-CN and g-CN-1 mg PTCDA.

|                                                                                                                                                                    | g-CN   | g-CN-1 mg PTCDA |
|--------------------------------------------------------------------------------------------------------------------------------------------------------------------|--------|-----------------|
| A1                                                                                                                                                                 | 0.7867 | 0.7809          |
| $\tau_1$                                                                                                                                                           | 1.3524 | 1.4695          |
| A2                                                                                                                                                                 | 0.2536 | 0.2430          |
| $\tau_2$                                                                                                                                                           | 7.1001 | 6.3826          |
| Average life time [ns]                                                                                                                                             | 4.97   | 4.29            |
| $k_{ET}/10^8 s^{-1}$                                                                                                                                               |        | 0.32            |
| $\eta_{ET}/\%$                                                                                                                                                     |        | 13.7            |
| $k_{ET} = (1/\tau_{Ave})_{nanohybrid} - (1/\tau_{Ave})_{g-CN}$ ; $\eta_{ET} = [(1/\tau_{Ave})_{nanohybrid} - (1/\tau_{Ave})_{g-CN}] / (1/\tau_{Ave})_{nanohybrid}$ |        |                 |

**Table S4** The fitting values for the electrochemical impedance spectroscopy simulation fit for g-CN and g-CN-1 mg PTCDA.

| Samples         | Rs    | R <sub>ct</sub> ( $\Omega$ ) | CPE <sub>ct</sub> ( $\mu$ F) |
|-----------------|-------|------------------------------|------------------------------|
| g-CN            | 25.15 | 16478                        | 0.94                         |
| g-CN-1 mg PTCDA | 25.71 | 9804                         | 0.93                         |

## References

1. Song, X.; Zhang, X.; Wang, M.; Li, X.; Zhu, Z.; Huo, P.; Yan, Y. Fabricating Intramolecular Donor-Acceptor System via Covalent Bonding of Carbazole to Carbon Nitride for Excellent Photocatalytic Performance towards CO<sub>2</sub> Conversion. *Journal of Colloid and Interface Science* **2021**, *594*, 550–560.
2. Song, X.; Mao, W.; Wu, Y.; Wang, M.; Liu, X.; Zhou, W.; Huo, P. Fabricating Carbon Nitride-Based 3D/0D Intramolecular Donor-Acceptor Catalysts for Efficient Photoreduction of CO<sub>2</sub>. *New J. Chem.* **2022**, *46*, 20225–20234.
3. Hayat, A.; Rahman, M.U.; Khan, I.; Khan, J.; Sohail, M.; Yasmeen, H.; Liu, S.; Qi, K.; Lv, W. Conjugated Electron Donor-Acceptor Hybrid Polymeric Carbon Nitride as a Photocatalyst for CO<sub>2</sub> Reduction. *Molecules* **2019**, *24*, 1779.
4. Zhang, X.; Wang, M.; Song, X.; Yan, Y.; Huo, P.; Yan, Y.; Yang, B. Boosting Charge Carrier Separation Efficiency by Constructing an Intramolecular DA System towards Efficient Photoreduction of CO<sub>2</sub>. *New J. Chem.* **2021**, *45*, 6042–6052.
5. Zhong, H.; Hong, Z.; Yang, C.; Li, L.; Xu, Y.; Wang, X.; Wang, R. A Covalent Triazine-Based Framework Consisting of Donor-Acceptor Dyads for Visible-Light-Driven Photocatalytic CO<sub>2</sub> Reduction. *ChemSusChem* **2019**, *12*, 4493–4499.
6. Xu, N.; Diao, Y.; Qin, X.; Xu, Z.; Ke, H.; Zhu, X. Donor-Acceptor Covalent Organic Frameworks of Nickel (II) Porphyrin for Selective and Efficient CO<sub>2</sub> Reduction into CO. *Dalton Trans.* **2020**, *49*, 15587–15591.
7. Zhang, X.; Song, X.; Yan, Y.; Huo, P. Construction of Carbon Nitride Based Intramolecular D-A System for Effective Photocatalytic Reduction of CO<sub>2</sub>. *Catal Lett* **2022**, *152*, 559–569.
